# Supplementary material
Source: MDPI journal article supplement (https://www.mdpi.com/2073-4433/10/8/439)
Supplement: s1 [file s1]

SUPPLEMENTARY MATERIAL

# Commuter exposure to black carbon, fine particulate matter and particle number concentration in ferry and the pier in Istanbul

Burcu Onat \*, Ülkü Alver Şahin, Burcu Uzun, Özcan Akın, Fazilet Özkaya, Coşkun Ayvaz

Istanbul University-Cerrahpaşa, Engineering Faculty, Environmental Engineering Department, city, postcode, Turkey

Supplementary S1

**Table S1.** The ferry characteristics.

| Transport Mode | Type         | Width (m) | Length (m) | Speed (knot) | Passenger Capacity | Car Capacity |
|----------------|--------------|-----------|------------|--------------|--------------------|--------------|
| Fast ferry     | Catamaran    | 10        | 35         | 32           | 400                | -            |
| Car ferry      | Double ended | 21        | 82.27      | 22           | 600                | 108          |

**Table S2.** Ferry activity and external emission sources at the piers.

| Piers    | Departure/day (summer) | Departure/day (winter) | Local Emission Sources               | External Emission Sources                                                                         |
|----------|------------------------|------------------------|--------------------------------------|---------------------------------------------------------------------------------------------------|
| Bakırköy | 6                      | 6                      | Fast ferry                           | Poor road traffic, yacht marina activity near the pier                                            |
| Kadıköy  | 149                    | 147                    | Slow ferry (95%)<br>Fast ferry (5%)  | Very high road traffic, intense residential&commercial area,                                      |
| Bostancı | 76                     | 53                     | Slow ferry (13%)<br>Fast ferry (87%) | High road traffic, intense residential area, slow ferry activities near the pier.                 |
| Yenikapı | 47                     | 22                     | Fast ferry, car ferry                | Very high road traffic                                                                            |
| Yalova   | 28                     | 23                     | Car ferry                            | High road traffic, shipping port activities (Yalova-Topçular port) about 5 km away from the pier. |

**Table S3.** The mean concentrations in fast ferry and car ferry in the monthly basis.

| Months    | Fast Ferry                       |                             |                                            | Car Ferry                        |                             |                                            |
|-----------|----------------------------------|-----------------------------|--------------------------------------------|----------------------------------|-----------------------------|--------------------------------------------|
|           | PNC<br>(pt<br>cm <sup>-3</sup> ) | BC<br>(µg m <sup>-3</sup> ) | PM <sub>2.5</sub><br>(µg m <sup>-3</sup> ) | PNC<br>(pt<br>cm <sup>-3</sup> ) | BC<br>(µg m <sup>-3</sup> ) | PM <sub>2.5</sub><br>(µg m <sup>-3</sup> ) |
| January   | -                                | -                           | -                                          | 16866                            | 0.9                         | 16.5                                       |
| February  | -                                | -                           | -                                          | 16598                            | 1.2                         | 19.7                                       |
| March     | 51109                            | 12.3                        | -                                          | -                                | -                           | -                                          |
| April     | 23680                            | 10.9                        | 16.0                                       | -                                | -                           | -                                          |
| May       | 18535                            | 4.8                         | 19.8                                       | -                                | -                           | -                                          |
| June      | 31904                            | 9.7                         | 12.1                                       | 27376                            | 0.4                         | 3.5                                        |
| July      | 21332                            | 7.7                         | 12.4                                       | 24088                            | 1.3                         | 21.4                                       |
| August    | 16839                            | 13.3                        | 24.0                                       | 12122                            | 1.6                         | 5.8                                        |
| September | 16401                            | 17.0                        | 22.9                                       | 28468                            | 2.3                         | 19.9                                       |
| October   | 25158                            | 4.4                         | 19.0                                       | 18268                            | 0.7                         | 13.2                                       |
| November  | 25550                            | 1.4                         | 26.8                                       | 23547                            | -                           | 16.3                                       |
| December  | 28639                            | 1.5                         | 26.0                                       | 20190                            | 0.7                         | 16.4                                       |

**Table S4.** The median concentrations in fast ferry and car ferry in the monthly basis.

| Months    | Fast Ferry                       |                             |                                            | Car Ferry                        |                             |                                            |
|-----------|----------------------------------|-----------------------------|--------------------------------------------|----------------------------------|-----------------------------|--------------------------------------------|
|           | PNC<br>(pt<br>cm <sup>-3</sup> ) | BC<br>(µg m <sup>-3</sup> ) | PM <sub>2.5</sub><br>(µg m <sup>-3</sup> ) | PNC<br>(pt<br>cm <sup>-3</sup> ) | BC<br>(µg m <sup>-3</sup> ) | PM <sub>2.5</sub><br>(µg m <sup>-3</sup> ) |
| January   | -                                | -                           | -                                          | 16993                            | 2,3                         | 16,1                                       |
| February  | -                                | -                           | -                                          | 16749                            | 1,1                         | 19,3                                       |
| March     | 46935                            | 11,3                        | -                                          | -                                | -                           | -                                          |
| April     | 17531                            | 9,0                         | 15,0                                       | -                                | -                           | -                                          |
| May       | 15625                            | 4,2                         | 19,8                                       | -                                | -                           | -                                          |
| June      | 29194                            | 8,3                         | 9,7                                        | 23743                            | 0,4                         | 2,8                                        |
| July      | 17963                            | 6,3                         | 10,8                                       | 23860                            | 1,3                         | 21,4                                       |
| August    | 13797                            | 11,1                        | 22,8                                       | 9298                             | 1,3                         | 5,6                                        |
| September | 14142                            | 15,4                        | 22,6                                       | 28468                            | 2,2                         | 18,9                                       |
| October   | 15298                            | 2,2                         | 16,7                                       | 20002                            | 0,7                         | 13,3                                       |
| November  | 14875                            | 2,1                         | 25,2                                       | 23245                            | -                           | 12,6                                       |
| December  | 21400                            | 2,6                         | 24,9                                       | 19749                            | 0,3                         | 16,1                                       |

**Table S5.** The mean concentrations at the pier in the monthly basis.

| Months    | Bakırköy                         |                                |                                               | Bostancı                         |                                |                                               | Yenikapı                         |                                |                                               | Yalova                           |                                |                                            |
|-----------|----------------------------------|--------------------------------|-----------------------------------------------|----------------------------------|--------------------------------|-----------------------------------------------|----------------------------------|--------------------------------|-----------------------------------------------|----------------------------------|--------------------------------|--------------------------------------------|
|           | UFP<br>(pt<br>cm <sup>-3</sup> ) | BC<br>(µg<br>m <sup>-3</sup> ) | PM <sub>2.5</sub><br>(µg<br>m <sup>-3</sup> ) | UFP<br>(pt<br>cm <sup>-3</sup> ) | BC<br>(µg<br>m <sup>-3</sup> ) | PM <sub>2.5</sub><br>(µg<br>m <sup>-3</sup> ) | UFP<br>(pt<br>cm <sup>-3</sup> ) | BC<br>(µg<br>m <sup>-3</sup> ) | PM <sub>2.5</sub><br>(µg<br>m <sup>-3</sup> ) | UFP<br>(pt<br>cm <sup>-3</sup> ) | BC<br>(µg<br>m <sup>-3</sup> ) | PM <sub>2.5</sub><br>(µg m <sup>-3</sup> ) |
| January   | -                                | -                              | -                                             | -                                | -                              | -                                             | 39306                            | 9.6                            | 36.3                                          | 6375                             | 2.8                            | 25.4                                       |
| February  | -                                | -                              | -                                             | -                                | -                              | -                                             | 34760                            | 13.8                           | 31.9                                          | 60349                            | 32.9                           | 26.3                                       |
| March     | 49405                            | 16.4                           | -                                             | 18731                            | 36.4                           | -                                             | -                                | -                              | -                                             | -                                | -                              | -                                          |
| April     | 30271                            | 9.0                            | 31.9                                          | 15173                            | 3.2                            | 23.0                                          | -                                | -                              | -                                             | -                                | -                              | -                                          |
| May       | 54799                            | 5.6                            | 27.3                                          | 23006                            | 16.7                           | 31.0                                          | -                                | -                              | -                                             | -                                | -                              | -                                          |
| June      | 33001                            | 6.7                            | 14.9                                          | 31459                            | 35.9                           | 22.1                                          | 11363                            | 1.1                            | 7.2                                           | 101886                           | 8.7                            | 10.5                                       |
| July      | 19695                            | 8.2                            | 13.3                                          | 16076                            | 29.1                           | 19.7                                          | 14548                            | 2.9                            | 34.8                                          | 54891                            | 18.5                           | 29.2                                       |
| August    | 13651                            | 7.0                            | 24.1                                          | 20168                            | 22.1                           | 24.3                                          | 25354                            | 2.8                            | 12.8                                          | 33667                            | 9.4                            | 11.2                                       |
| September | 16426                            | 2.5                            | 218                                           | 10711                            | 5.8                            | 23.8                                          | 10998                            | 3.6                            | 22.7                                          | 7786                             | 2.5                            | 31.0                                       |
| October   | 51836                            | 2.6                            | 26.8                                          | 14736                            | 2.8                            | 71.9                                          | 13429                            | 1.6                            | 17.5                                          | 34722                            | 7.6                            | 19.9                                       |
| November  | 45512                            | 2.1                            | 31.8                                          | 53199                            | 21.7                           | 32.7                                          | 36444                            | 8.5                            | 34.4                                          | 36361                            | 16.4                           | 34.2                                       |
| December  | 34506                            | 2.7                            | 34.8                                          | 17531                            | 2.9                            | 36.6                                          | 28774                            | 4.3                            | 40.9                                          | -                                | -                              | -                                          |

**Table S6.** The median concentrations at the pier in the monthly basis.

| Months    | Bakırköy                            |                                |                                               | Bostancı                            |                                |                                               | Yenikapı                            |                                |                                               | Yalova                              |                                |                                               |
|-----------|-------------------------------------|--------------------------------|-----------------------------------------------|-------------------------------------|--------------------------------|-----------------------------------------------|-------------------------------------|--------------------------------|-----------------------------------------------|-------------------------------------|--------------------------------|-----------------------------------------------|
|           | UFP<br>(pt<br>cm <sup>-3</sup><br>) | BC<br>(µg<br>m <sup>-3</sup> ) | PM <sub>2.5</sub><br>(µg<br>m <sup>-3</sup> ) | UFP<br>(pt<br>cm <sup>-3</sup><br>) | BC<br>(µg<br>m <sup>-3</sup> ) | PM <sub>2.5</sub><br>(µg<br>m <sup>-3</sup> ) | UFP<br>(pt<br>cm <sup>-3</sup><br>) | BC<br>(µg<br>m <sup>-3</sup> ) | PM <sub>2.5</sub><br>(µg<br>m <sup>-3</sup> ) | UFP<br>(pt<br>cm <sup>-3</sup><br>) | BC<br>(µg<br>m <sup>-3</sup> ) | PM <sub>2.5</sub><br>(µg<br>m <sup>-3</sup> ) |
| January   | -                                   | -                              | -                                             | -                                   | -                              | -                                             | 3677<br>5                           | 9.1                            | 35.0                                          | 6115                                | 2.3                            | 21.0                                          |
| February  | -                                   | -                              | -                                             | -                                   | -                              | -                                             | 3165<br>1                           | 13.5                           | 29.9                                          | 5209<br>0                           | 26.8                           | 19.1                                          |
| March     | 4664<br>4                           | 15.9                           | -                                             | 1711<br>0                           | 37.3                           | -                                             | -                                   | -                              | -                                             | -                                   | -                              | -                                             |
| April     | 2879<br>8                           | 8.4                            | 29.2                                          | 1463<br>2                           | 3.3                            | 22.6                                          | -                                   | -                              | -                                             | -                                   | -                              | -                                             |
| May       | 5358<br>9                           | 4.8                            | 27.3                                          | 2610<br>6                           | 7.9                            | 31.0                                          | -                                   | -                              | -                                             | -                                   | -                              | -                                             |
| June      | 2980<br>5                           | 3.5                            | 14.1                                          | 2488<br>8                           | 19.1                           | 19.7                                          | 1106<br>3                           | 0.5                            | 6.3                                           | 9993<br>7                           | 6.4                            | 8.4                                           |
| July      | 1839<br>4                           | 7.3                            | 12.2                                          | 1471<br>4                           | 26.0                           | 17.5                                          | 1109<br>2                           | 1.8                            | 33.6                                          | 5328<br>1                           | 16.9                           | 27.3                                          |
| August    | 1073<br>3                           | 6.6                            | 23.5                                          | 1504<br>1                           | 9.5                            | 22.2                                          | 2268<br>4                           | 0.8                            | 10.2                                          | 3524<br>4                           | 0.5                            | 8.8                                           |
| September | 1489<br>8                           | 1.7                            | 21.0                                          | 1017<br>9                           | 5.6                            | 22.9                                          | 1090<br>4                           | 3.2                            | 18.2                                          | 7889                                | 2.0                            | 30.8                                          |
| October   | 5290<br>9                           | 3.1                            | 25.6                                          | 1239<br>3                           | 1.9                            | 69.9                                          | 1330<br>6                           | 1.0                            | 16.8                                          | 2912<br>2                           | 5.0                            | 17.5                                          |
| November  | 4105<br>4                           | 1.9                            | 29.5                                          | 5319<br>9                           | 17.3                           | 31.4                                          | 3577<br>3                           | 7.7                            | 34.3                                          | 3195<br>3                           | 13.1                           | 25.9                                          |
| December  | 3215<br>6                           | 2.5                            | 33.1                                          | 1638<br>9                           | 2.3                            | 33.9                                          | 2784<br>2                           | 4.4                            | 39.2                                          | -                                   | -                              | -                                             |

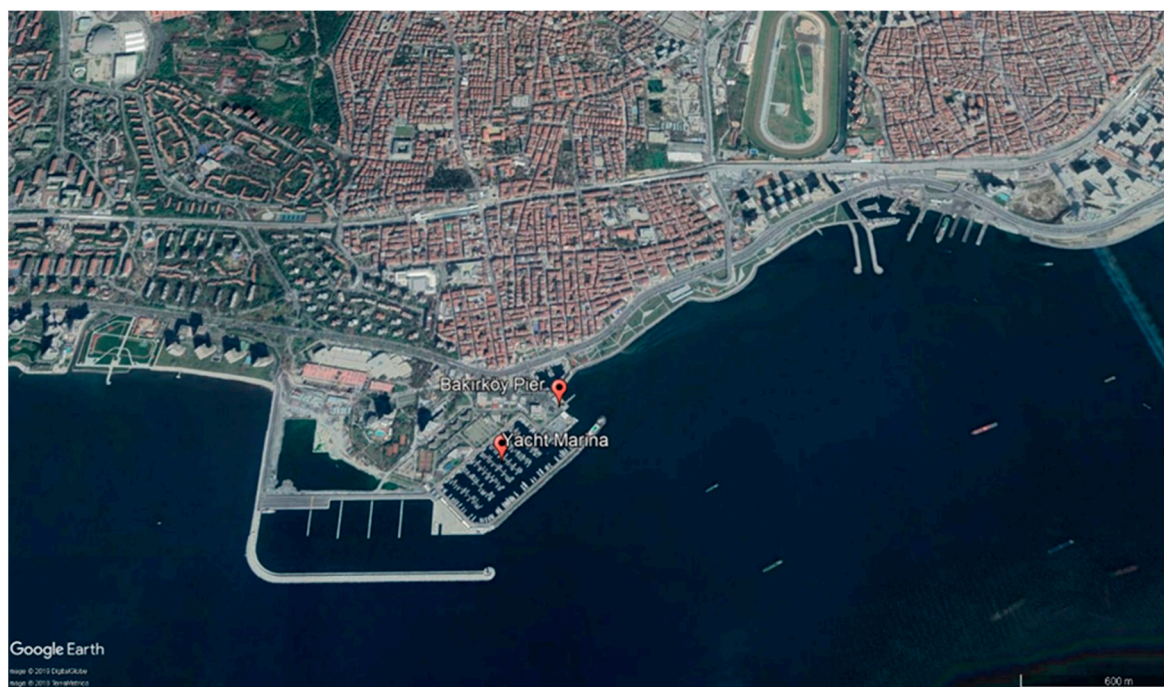

(a)

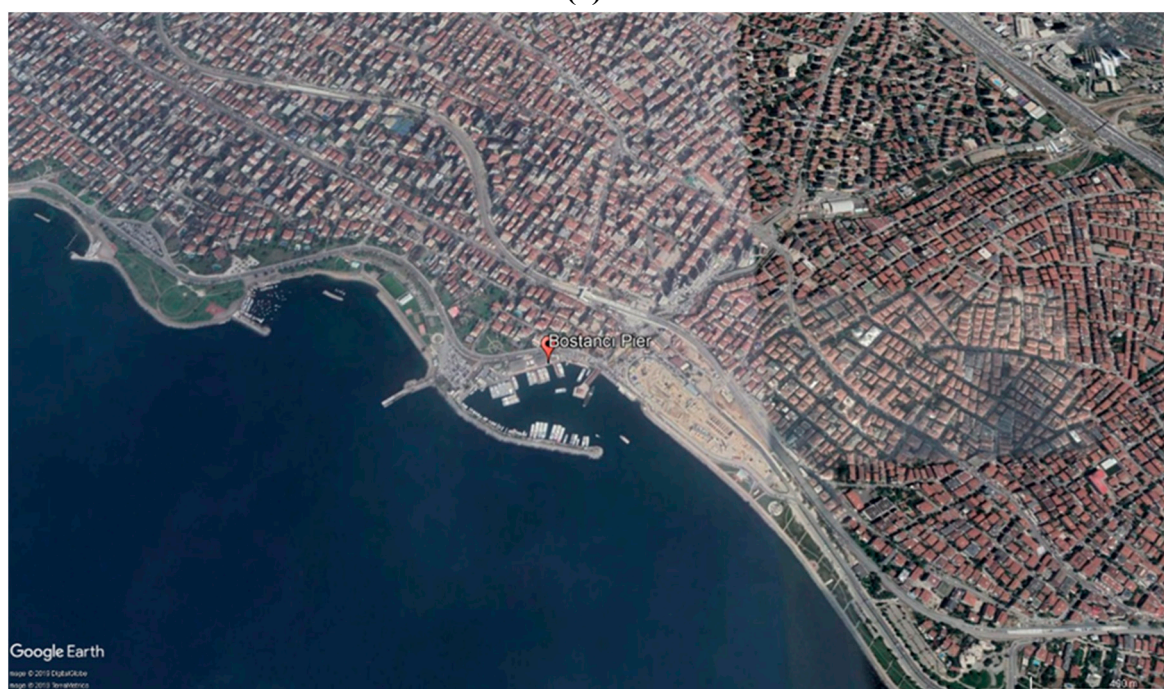

(b)



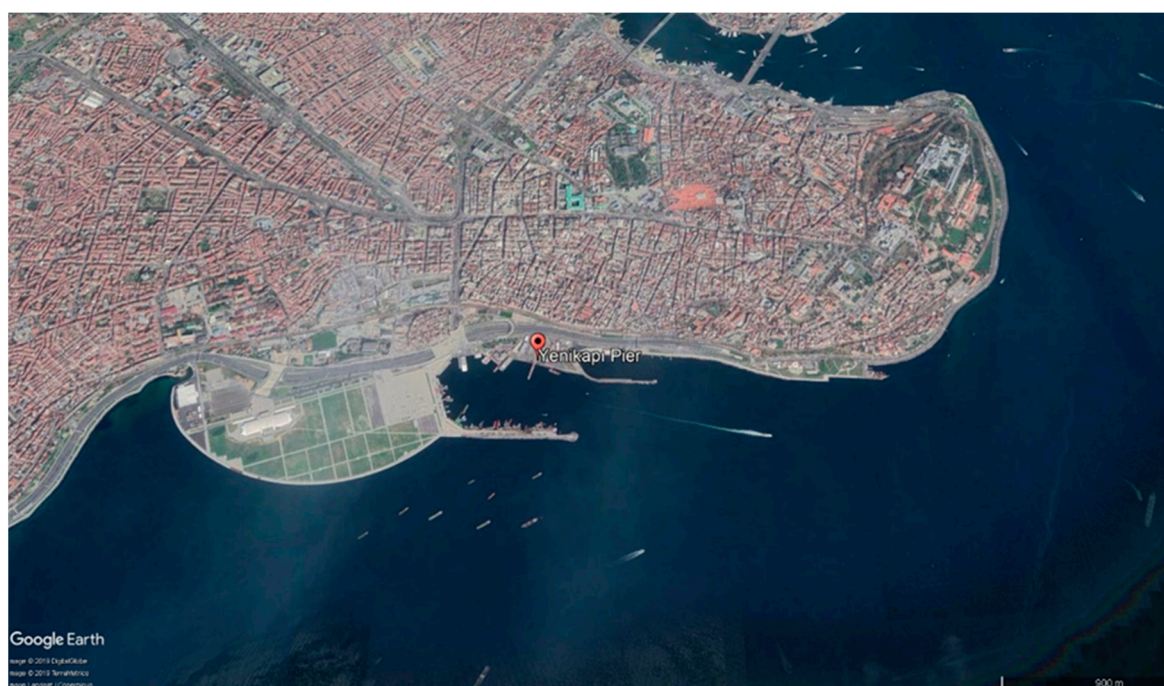

(c)

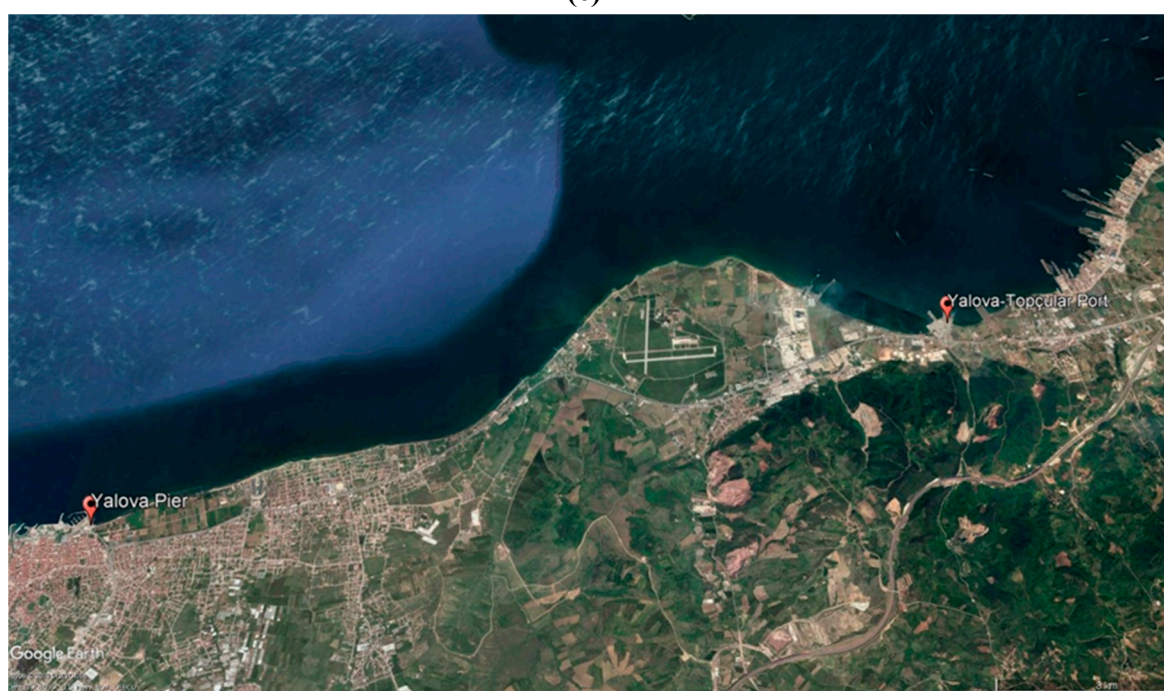

(d)

**Figure S1.** The location of the piers (a) Bakırköy pier and yacht marina, (b) Bostancı pier (c) Yenikapi pier (d) Yalova pier and Yalova-Topçular Port.

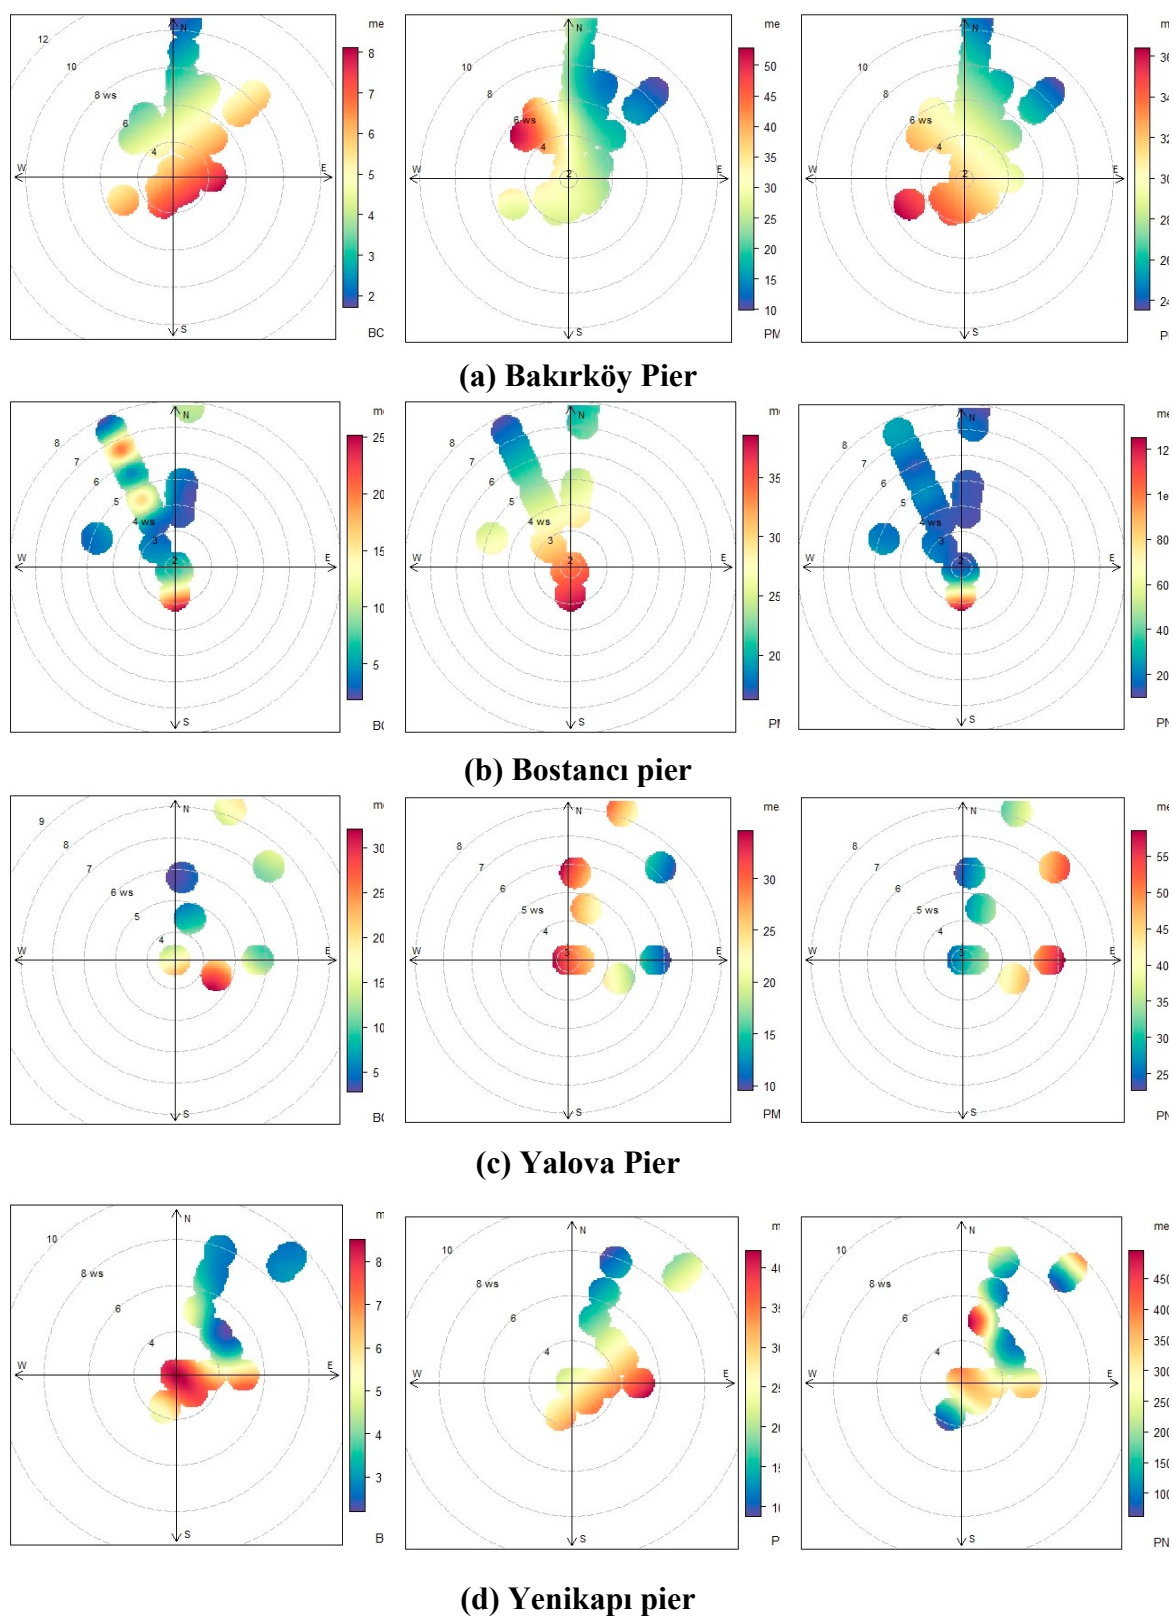

**Figure S2.** Polar plots of analysed air pollutants. BC, PM<sub>2.5</sub> and PNC data were hourly- averaged to be matched with wind data.



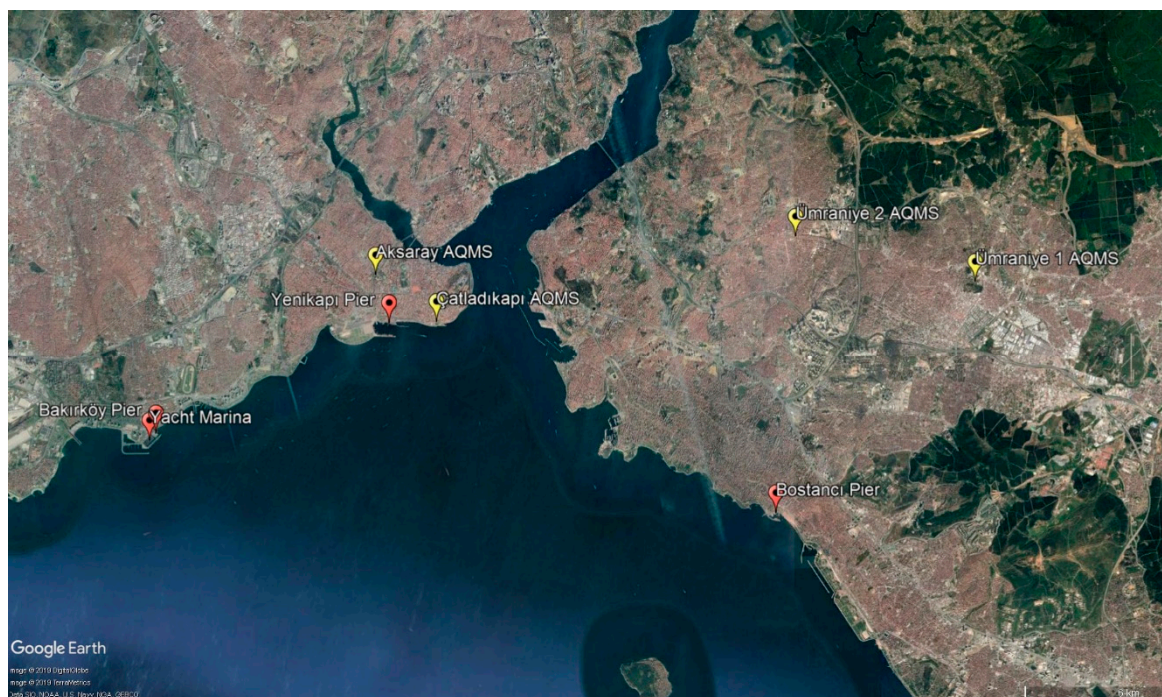

(a)

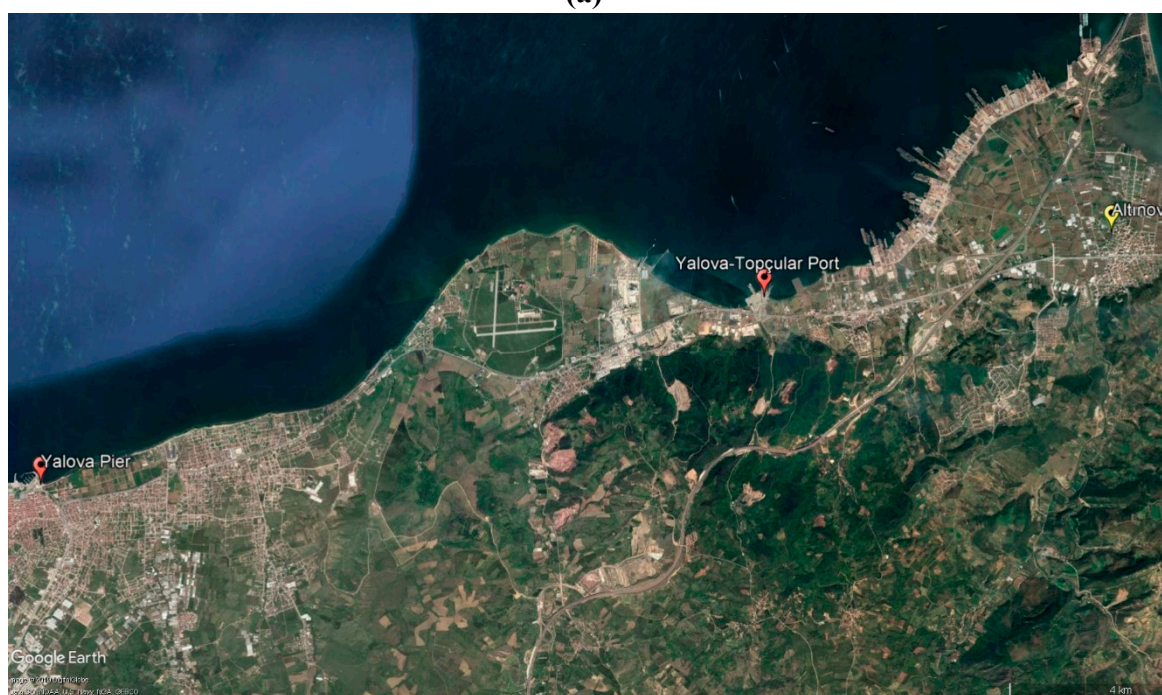

(b)

**Figure S3.** Air Quality monitoring stations (yellow mark) and the piers (red mark) (a) Bakırköy-Bostancı-Yenikapı piers (b) Yalova pier.

Table S7. Exposure concentrations of PNC, BC and PM<sub>2.5</sub> (median  $\pm$  std) for ferry and pier.

| Commute Mode  | Exposure                                   |                      |                                     |
|---------------|--------------------------------------------|----------------------|-------------------------------------|
|               | UFP (particles)                            | BC ( $\mu\text{g}$ ) | PM <sub>2.5</sub> ( $\mu\text{g}$ ) |
| Fast ferry    | $78.5\text{E}^{+8} \pm 70.7\text{E}^{+8}$  | $2.4 \pm 4.1$        | $8.5 \pm 4.8$                       |
| Bakırköy pier | $14.3\text{E}^{+8} \pm 14.8\text{E}^{+8}$  | $0.2 \pm 0.5$        | $1.4 \pm 1.1$                       |
| Bostancı pier | $8.9\text{E}^{+8} \pm 9.9\text{E}^{+8}$    | $0.3 \pm 1.2$        | $1.5 \pm 2.0$                       |
| Car ferry     | $195.2\text{E}^{+8} \pm 87.1\text{E}^{+8}$ | $1.2 \pm 2.6$        | $14.7 \pm 8.2$                      |
| Yenikapı pier | $17.7\text{E}^{+8} \pm 12.8\text{E}^{+8}$  | $0.3 \pm 1.3$        | $1.5 \pm 1.1$                       |
| Yalova pier   | $20.7\text{E}^{+8} \pm 17.8\text{E}^{+8}$  | $0.4 \pm 0.7$        | $1.3 \pm 1.4$                       |

Table S8. Exposure per/kilometer for PNC, BC and PM<sub>2.5</sub>. and comparison to the previous study in Istanbul.

| Commute Mode       | Exposure                                 |                                |                                               |
|--------------------|------------------------------------------|--------------------------------|-----------------------------------------------|
|                    | PNC (particles/km)                       | BC ( $\mu\text{g}/\text{km}$ ) | PM <sub>2.5</sub> ( $\mu\text{g}/\text{km}$ ) |
| Fast ferry         | $3.73\text{E}^{+8} \pm 2.0\text{E}^{+8}$ | $0.11 \pm 0.07$                | $0.29 \pm 0.14$                               |
| Car ferry          | $3.88\text{E}^{+8} \pm 1.3\text{E}^{+8}$ | $0.02 \pm 0.01$                | $0.27 \pm 0.12$                               |
| Bus                | $7.0\text{E}^{+8} \pm 3.6\text{E}^{+8}$  | $0.22 \pm 0.17$                | $0.74 \pm 0.40$                               |
| Light-rail         | $2.4\text{E}^{+8} \pm 1.4\text{E}^{+8}$  | $0.07 \pm 0.03$                | $0.33 \pm 0.21$                               |
| Car Windows closed | $1.0\text{E}^{+8} \pm 0.9\text{E}^{+8}$  | $0.03 \pm 0.03$                | $0.10 \pm 0.11$                               |

Table S9. Monthly average of meteorological parameters.

|           | Temp.<br>(°C) | Humidity<br>(%) | Atmospheric Pressure<br>(hPa) | Wind Speed<br>(m/s) |
|-----------|---------------|-----------------|-------------------------------|---------------------|
| January   | 4.0           | 76.1            | 1017.4                        | 5.7                 |
| February  | 7.0           | 73.9            | 1019.6                        | 4.3                 |
| March     | 10.0          | 70.9            | 1012.6                        | 4.3                 |
| April     | 19.5          | 61.1            | 1013.3                        | 3.6                 |
| May       | 17.7          | 68.9            | 1010.7                        | 4.2                 |
| June      | 24.1          | 59.0            | 1009.0                        | 4.5                 |
| July      | 26.2          | 56.0            | 1009.1                        | 5.1                 |
| August    | 26.5          | 64.0            | 1009.8                        | 5.7                 |
| September | 22.6          | 59.9            | 1012.6                        | 4.6                 |
| October   | 17.0          | 66.4            | 1016.1                        | 4.4                 |
| November  | 12.8          | 63.1            | 1016.9                        | 4.7                 |
| December  | 5.5           | 71.2            | 1021.6                        | 5.6                 |



**Supplementary S2:**

The commuter exposure per mile and per kilometer were estimated according to the equation-S1 as given below [1]. Only the in-vessel/vehicle personal exposures during trips were calculated using this equation. The per-minute ventilation rates for fast ferry and car ferry were assumed to be  $12.7 \text{ L min}^{-1}$ .

**Equation-S1:**

$$\text{Commute exposure} = \frac{[\text{Concentration } (\mu\text{g m}^{-3}) \times \text{Time (min)}] / \text{Distance (km)} \times \text{Inhalation Rate (m}^3 \text{ min}^{-1})}{(\mu\text{g/km})}$$

**Supplementary S3:****Calibration for pDR 1200**

A comparison between Thermo pDR 1200 (light-scattering method) and Thermo Partisol FRM (gravimetric method) was conducted. Thermo pDR 1200 and Thermo partisol FRM samples were colocated and measurements were taken simultaneously for 10 consecutive days. The gravimetric analysis of  $\text{PM}_{2.5}$  concentrations was conducted using an electronic balance with a sensitivity of 0.01 mg. Figure S1 shows the correlation ( $R^2 = 0.79$ ) between the two methods.  $\text{PM}_{2.5}$  concentrations measured in this study were corrected using this correlation.

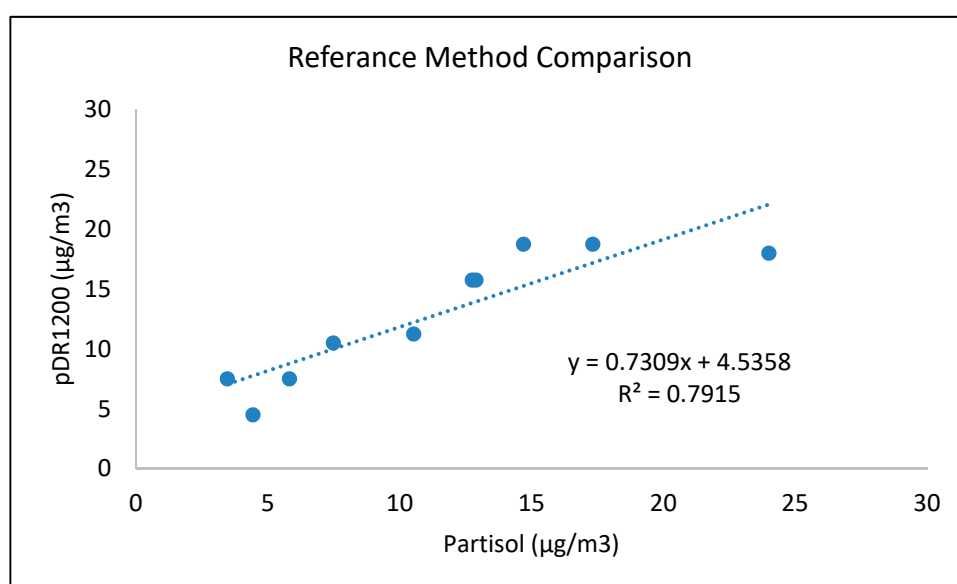

**Figure S1.** Comparison of Thermo pDR 1200 and Thermo Partisol FRM sampler  $\text{PM}_{2.5}$  measurements.

**PNC**

PNC measurements  $>100,000 \text{ particles cm}^{-3}$  were corrected to prevent the underestimation of particle counts at high concentrations measured by TSI model 3007 CPC [2]. The following equation was used for the correction:

$$y = 38456e^{0.00001x} \text{ for } x > 100,000 \text{ cm}^{-3},$$

where  $x$  = the CPC reading for PNC concentration and  $y$  = the adjusted PNC value. The corrected data was  $\sim 0.1\%$  of total PNC data.

**BC**

The micro-aethalometer (Model AE51) was used to collect BC data. The filter strips in the AE51 were changed when attenuation value was in the range of 75–80. BC data has noise (peak and negative values) because of instrument maintenance; measurement sensitivity, such as vibration; humidity; flow rate; and operating conditions. Some data will be higher or lower than the actual value. These deviations and negative values are needed for post-processing or smoothing. There are various smoothing algorithms found on the manufacturer's website (aethlabs.com). The Optimized Noise-reduction Averaging (ONA) algorithm, which was developed by Hagler et al. (2011), was first applied for smoothing our BC data. The ONA algorithm decreases the occurrence of negative values to nearly zero while protecting the trends in the time series.

Next, a correction was applied for filter loading. Specifically, with the aethalometer (filter-based light transmission method), the BC attenuation coefficient decreases with increased BC mass loading. The adjustment for filter loading was applied using the following equations [3,4]:

$$ATN = 100 \ln (I_0/I),$$

where ATN is the attenuation factor, intensities  $I_0$  and  $I$  correspond to the initial and subsequent filter conditions (Ref/Sens);

$$Tr = \exp(ATN/100),$$

where  $Tr$  is the measured filter transmission; and

$$BC_{abs} = BC_i / (0.88 \times Tr + 0.12),$$

where  $BC_{abs}$  is the corrected BC and  $BC_i$  is the initial BC value.

## References

- 1 Ham, W.; Vijayan, A.; Schulte, N.; Herner, J.D. Commuter exposure to  $PM_{2.5}$ , BC and UFP in six common transport microenvironment in Sacramento, California. *Atmos. Environ.* **2017**, *167*, 335–345.
- 2 Westerdahl, D.; Fruin, S.A.; Sax, T.; Fine, P.M.; Sioutas, C. Mobile platform measurements of ultrafine particles and associated pollutant concentrations on freeways and residential streets in Los Angeles. *Atmos. Environ.* **2005**, *39*, 3597–3610.
- 3 Kirchstetter, T.W.; Novakov, T. Controlled generation of black carbon particles from a diffusion flame and applications in evaluating black carbon measurement methods. *Atmos. Environ.* **2007**, *41*, 1874–1888.
- 4 Wang, X.; Westerdahl, D.; Wu, Y.; Pan, X.; Zang, K.M.. On-road emission factor distributions of individual diesel vehicles in and around Beijing, China. *Atmos. Environ.* **2011**, *45*, 503–513.
